# Supplementary material for: A self-assembled metal–organic framework for enhanced UO22+ fluorescence sensing: integration of an octa-nuclear zinc cluster with hexakis(4-carboxyphenoxy)cyclotriphosphazene
Source: Royal Society of Chemistry journal article supplement (doi:10.1039/d4ce00401a), 2024-01-01
Supplement: d4ce00401a1.pdf [file d4ce00401a1.pdf]

**A Self-Assembled Metal-Organic Framework for Enhanced UO<sub>2</sub><sup>2+</sup>  
Fluorescent Sensing: Integration of Octa-Nuclear Zinc Cluster with  
Hexakis(4-Carboxyphenoxy)Cyclotriphosphazene**

**Xi Chen,<sup>\*a</sup> Zi-tong Chen,<sup>b</sup> Shi-xian Xu,<sup>a</sup> Yuan Chen,<sup>b</sup> Jia-ping Tong<sup>\*c</sup> and Bao  
Li<sup>\*b</sup>**

*<sup>a</sup> School of Chemistry and Environmental Science, Shangrao Normal University,  
Shangrao, Jiangxi, 334001, People's Republic of China. Email:  
chenxihaoyang@163.com.*

*<sup>b</sup> Key Laboratory of Material Chemistry for Energy Conversion and Storage,  
Semiconductor chemistry center, School of Chemistry and Chemical Engineering,  
Hubei Key Laboratory of Bioinorganic Chemistry & Materia Medica, Huazhong  
University of Science and Technology, Wuhan, Hubei, 430074, People's Republic of  
China. Email: libao@hust.edu.cn.*

*<sup>c</sup> Laboratory of Physicochemical Analysis, Training Base, Army Logistics Academy,  
Chongqing 400041, People's Republic of China. Email: jiapingtong@hotmail.com.*

## Experimental sections

**Materials and General Methods.** All reagents were purchased from commercial sources and were used without further purification. Elemental analyses (C, H and N) were performed on a Perkin-Elmer 2400 analyzer. FT-IR spectra were recorded as KBr pellets with an Equinox 55 FT-IR spectrophotometer (4000-400  $\text{cm}^{-1}$ ). Thermogravimetric analysis (TGA) was performed on a Perkin-Elmer TGA4000 analyzer from room temperature to 800 °C at an rate of 10 °C/min under a  $\text{N}_2$  atmosphere. Powder X-ray diffraction (PXRD) patterns for the as-synthesized samples were recorded on a X-ray diffraction meter (D/max 2500 PC, Rigaku) with  $\text{Cu-K}\alpha$  radiation (1.5406 Å), PXRD data were collected over the  $2\theta$  range 5~50° at room temperature, with a step size of 0.02° in  $2\theta$  angle. All fluorescence spectra were measured with an RF-5301PC fluorescence spectrophotometer. Ultraviolet-visible (UV-vis) adsorption spectra were recorded at room temperature on UV-2550 spectrophotometer.

### Synthesis of hexakis(4-carboxyphenoxy)cyclotriphosphonitrile ( $\text{H}_6\text{L}$ )

Potassium carbonate (6.00 g, 0.043 mol) was added into a solution of anhydrous acetone (80 mL) containing 4-hydroxy-2-methylbenzoate (8.2 g, 0.054 mmol) and  $\text{P}_3\text{N}_3\text{Cl}_6$  (3.13g, 0.009 mol). The mixture was stirred overnight at 70°C. The solvent was removed by evaporation under reduced pressure, and the obtained solid was redissolved in 50 mL dichloromethane. The organic phase was washed with water and then dried over anhydrous  $\text{Na}_2\text{SO}_4$ . The volatiles were removed by evaporation under reduced pressure, and the product was dried as white powder (8.56 g, 91.5% yield).

A quantity of sodium hydroxide (3.0 g) was dissolved in 50 mL methanol, and then  $\text{P}_3\text{N}_3(\text{OC}_6\text{H}_4\text{COOCH}_3)_6$  (8.32 g) was added. The mixture was stirred overnight at 80°C. The volatiles were removed and the residue was dissolved in water, filtered and acidified to pH~2 using dilute hydrochloric acid. The product as a precipitate was obtained after stirring. The precipitate was collected by filtration, washing with water and drying (8.12 g, 93.6% yield). IR (KBr):  $\nu/\text{cm}^{-1}$  3097 (s), 2540 (m), 1700 (s), 1601 (m), 1509 (m), 1427 (m), 1288 (s), 1160 (s), 949 (s), 861(m), 771(m) and 732 (m).

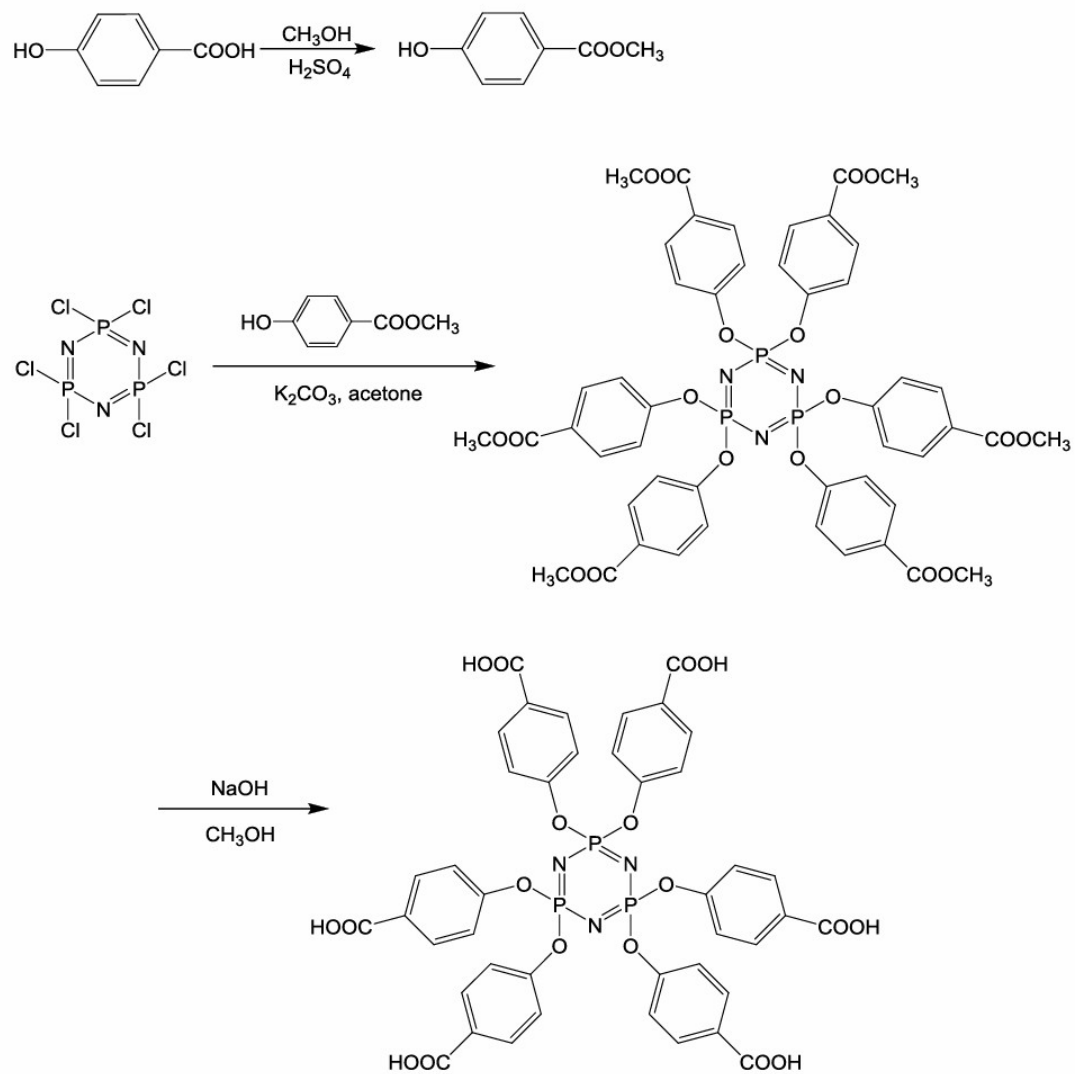

**Scheme S1** Synthetic route for the ligand H<sub>6</sub>L

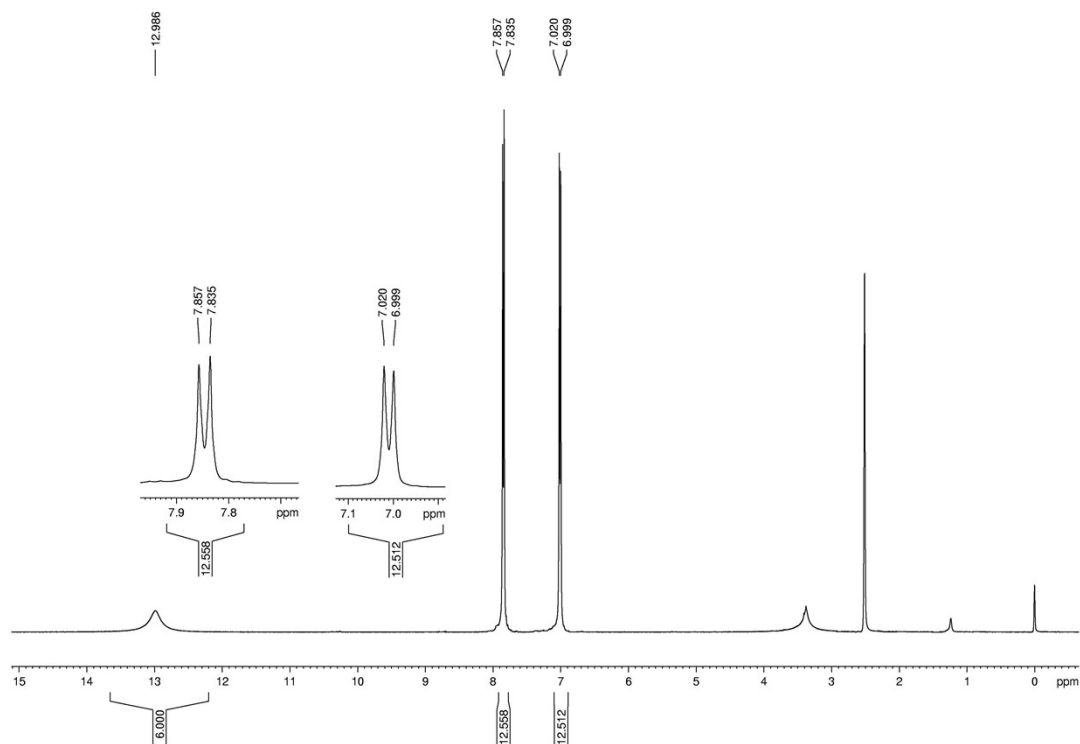

**Figure S1**  $^1\text{H}$ NMR spectra of ligand  $\text{H}_6\text{L}$

### Synthesis of Zn-MOF

A mixture of  $\text{Zn}(\text{NO}_3)_2 \cdot 6\text{H}_2\text{O}$  (60 mg, 0.2 mmol),  $\text{H}_6\text{L}$  (30 mg, 0.032 mmol) was dissolved in 3 mL of  $\text{H}_2\text{O}$  and 3 mL of acetonitrile. The mixture was put into a 25 mL Teflon-lined stainless steel vessel and sonicated for 5 min at room temperature, then the steel was placed in an oven at  $160^\circ\text{C}$  for 48 hours, and then cooled to room temperature at the rate of  $5^\circ\text{C}/\text{h}$ , then white block crystals were obtained. The crystals were collected by filtration, washing and drying under ambient conditions. Yield of the reaction was ca. 62% based on Zn. Anal. Element analysis for fresh sample: H, 2.59%; C, 38.24%; N, 3.18%; IR (KBr,  $\text{cm}^{-1}$ ): 3189 (s), 1601 (s), 1542 (s), 1411 (s), 1213 (s), 1157 (s), 959 (s), 861 (m), 788 (s), 689 (m).

### X-Ray Structural Determination.

Diffraction data for Zn-MOF ( $0.1 \times 0.05 \times 0.05$  mm) was collected via Bruker Venture using Mo-K $\alpha$  ( $\lambda = 0.71073 \text{ \AA}$ ) radiation at 298 K. The structures of complexes were solved by direct methods, and the non-hydrogen atoms were located from the trial structure and then refined anisotropically with SHELXTL using a full-matrix leastsquares procedure based on  $F^2$  values. The hydrogen atom positions were fixed

geometrically at calculated distances and allowed to ride on the parent atoms. Attempts to define the highly disordered solvent molecules were unsuccessful, so the structure was refined with the PLATON “SQUEEZE” procedure. The diffraction intensity of crystal sample was very weak due to the very small size and low density, which must be responsible for the corresponding alert A. CCDC-2349495 for the data under different temperature contain the supplementary crystallographic data for this paper. These data can be obtained free of charge from The Cambridge Crystallographic Data Centre via <http://www.ccdc.cam.ac.uk/datarequest/cif>.

**Table S1** Crystal data and structure refinements for Zn-MOF

| Identification code                         | Zn-MOF                                                                                        |
|---------------------------------------------|-----------------------------------------------------------------------------------------------|
| Empirical formula                           | C <sub>42</sub> H <sub>24</sub> N <sub>3</sub> O <sub>30</sub> P <sub>3</sub> Zn <sub>4</sub> |
| Formula weight                              | 1405.03                                                                                       |
| Temperature/K                               | 293(2)                                                                                        |
| Crystal system                              | triclinic                                                                                     |
| Space group                                 | P-1                                                                                           |
| a/Å                                         | 7.3860(15)                                                                                    |
| b/Å                                         | 15.868(3)                                                                                     |
| c/Å                                         | 19.198(4)                                                                                     |
| α/°                                         | 103.38(3)                                                                                     |
| β/°                                         | 95.61(3)                                                                                      |
| γ/°                                         | 99.79(3)                                                                                      |
| Volume/Å <sup>3</sup>                       | 2134.9(8)                                                                                     |
| Z                                           | 1                                                                                             |
| ρ <sub>calc</sub> /cm <sup>3</sup>          | 1.093                                                                                         |
| μ/mm <sup>-1</sup>                          | 1.227                                                                                         |
| F(000)                                      | 702.0                                                                                         |
| Radiation                                   | MoKα (λ = 0.71073)                                                                            |
| 2θ range for data collection/°              | 2.692 to 58.484                                                                               |
| Reflections collected                       | 10412                                                                                         |
| Independent reflections                     | 10412 [R <sub>sigma</sub> = 0.0289]                                                           |
| Data/restraints/parameters                  | 10412/24/689                                                                                  |
| Goodness-of-fit on F <sup>2</sup>           | 1.101                                                                                         |
| Final R indexes [I >= 2σ (I)]               | R <sub>1</sub> = 0.0799, wR <sub>2</sub> = 0.2234                                             |
| Final R indexes [all data]                  | R <sub>1</sub> = 0.0865, wR <sub>2</sub> = 0.2300                                             |
| Largest diff. peak/hole / e Å <sup>-3</sup> | 1.65/-2.50                                                                                    |

**Table S2** Bond Lengths for Zn-MOF

| Atom | Atom              | Length/Å   | Atom | Atom              | Length/Å |
|------|-------------------|------------|------|-------------------|----------|
| Zn01 | Zn04 <sup>1</sup> | 3.0988(11) | O19  | Zn02 <sup>3</sup> | 1.927(3) |
| Zn01 | O2                | 1.897(4)   | O10  | C22               | 1.170(6) |
| Zn01 | O24 <sup>1</sup>  | 1.884(4)   | O11  | Zn01 <sup>6</sup> | 2.035(4) |
| Zn01 | O4 <sup>2</sup>   | 2.168(3)   | O11  | C22               | 1.171(6) |
| Zn01 | O7                | 1.930(3)   | O5   | Zn04 <sup>4</sup> | 1.815(3) |
| Zn01 | O19               | 1.828(4)   | O5   | C8                | 1.178(7) |
| Zn01 | O11 <sup>2</sup>  | 2.035(4)   | O17  | Zn04 <sup>5</sup> | 1.797(4) |
| Zn02 | Zn02 <sup>3</sup> | 2.8607(14) | O17  | C36               | 1.206(6) |
| Zn02 | O1                | 1.899(3)   | O15  | C33               | 1.275(6) |
| Zn02 | O8 <sup>3</sup>   | 1.939(3)   | O14  | Zn03 <sup>4</sup> | 1.902(4) |
| Zn02 | O19 <sup>3</sup>  | 1.927(3)   | O14  | C29               | 1.153(7) |
| Zn02 | O19               | 1.919(4)   | O16  | C36               | 1.155(7) |
| Zn02 | O21               | 1.954(3)   | O13  | C29               | 1.182(8) |
| Zn02 | O20               | 2.030(4)   | C19  | C18               | 1.285(8) |
| Zn03 | Zn04 <sup>4</sup> | 2.9591(11) | C19  | C20               | 1.264(8) |
| Zn03 | O24 <sup>4</sup>  | 1.947(4)   | C4   | C5                | 1.336(6) |
| Zn03 | O10               | 1.877(3)   | C4   | C3                | 1.328(5) |
| Zn03 | O23               | 1.874(3)   | C1   | C2                | 1.363(6) |
| Zn03 | O14 <sup>4</sup>  | 1.902(4)   | C16  | C15               | 1.394(6) |
| Zn03 | O22               | 1.898(5)   | C16  | C17               | 1.290(8) |
| Zn03 | C22               | 2.586(5)   | C16  | C21               | 1.278(8) |
| Zn04 | Zn01 <sup>1</sup> | 3.0988(11) | C25  | C26               | 1.291(7) |
| Zn04 | Zn03 <sup>4</sup> | 2.9592(11) | C25  | C24               | 1.290(6) |
| Zn04 | O24               | 1.804(3)   | C18  | C17               | 1.290(7) |
| Zn04 | O5 <sup>4</sup>   | 1.815(4)   | C26  | C27               | 1.270(8) |
| Zn04 | O17 <sup>5</sup>  | 1.797(4)   | C6   | C7                | 1.334(6) |
| Zn04 | O13               | 1.801(5)   | C6   | C5                | 1.343(6) |
| Zn04 | C8 <sup>4</sup>   | 2.544(5)   | C7   | C2                | 1.345(6) |
| Zn04 | C36 <sup>5</sup>  | 2.485(6)   | C24  | C23               | 1.264(8) |
| P005 | P006              | 2.5561(19) | C20  | C21               | 1.305(7) |
| P005 | P007              | 2.585(2)   | C27  | C28               | 1.291(7) |
| P005 | O9                | 1.457(4)   | C39  | C40               | 1.280(8) |
| P005 | O12               | 1.463(3)   | C39  | C38               | 1.285(8) |
| P005 | N00U              | 1.459(5)   | C23  | C22               | 1.400(6) |
| P005 | N00Y              | 1.459(5)   | C23  | C28               | 1.299(7) |
| P006 | P007              | 2.554(2)   | C33  | C32               | 1.261(8) |
| P006 | O18               | 1.474(4)   | C33  | C34               | 1.261(8) |
| P006 | O15               | 1.464(4)   | C10  | C11               | 1.335(5) |

| Atom | Atom              | Length/Å | Atom | Atom              | Length/Å  |
|------|-------------------|----------|------|-------------------|-----------|
| P006 | N00S              | 1.458(5) | C10  | C9                | 1.329(6)  |
| P006 | N00U              | 1.459(5) | C41  | C40               | 1.293(7)  |
| P007 | O6                | 1.466(4) | C41  | C42               | 1.267(9)  |
| P007 | O3                | 1.462(4) | C14  | C13               | 1.338(6)  |
| P007 | N00S              | 1.475(5) | C14  | C9                | 1.339(6)  |
| P007 | N00Y              | 1.466(5) | C3   | C2                | 1.335(6)  |
| O9   | C19               | 1.295(5) | C11  | C12               | 1.330(6)  |
| O12  | C26               | 1.290(5) | C13  | C12               | 1.331(6)  |
| O1   | C1                | 1.171(6) | C8   | Zn04 <sup>4</sup> | 2.544(5)  |
| O6   | C12               | 1.260(6) | C8   | C9                | 1.365(6)  |
| O8   | Zn02 <sup>3</sup> | 1.939(3) | C38  | C37               | 1.291(7)  |
| O8   | C15               | 1.152(6) | C37  | C36               | 1.384(9)  |
| O3   | C5                | 1.258(6) | C37  | C42               | 1.282(8)  |
| O2   | C1                | 1.172(7) | C36  | Zn04 <sup>5</sup> | 2.485(6)  |
| O18  | C40               | 1.284(7) | C30  | C29               | 1.369(8)  |
| O24  | Zn01 <sup>1</sup> | 1.884(4) | C30  | C35               | 1.269(9)  |
| O24  | Zn03 <sup>4</sup> | 1.947(4) | C30  | C31               | 1.271(10) |
| O4   | Zn01 <sup>6</sup> | 2.168(3) | C32  | C31               | 1.261(10) |
| O4   | C8                | 1.152(6) | C34  | C35               | 1.288(9)  |
| O7   | C15               | 1.174(6) |      |                   |           |

<sup>1</sup>1-X,1-Y, 1-Z; <sup>2</sup>1+X,1+Y, +Z; <sup>3</sup>2-X, 2-Y, 2-Z; <sup>4</sup>-X,-Y,1-Z; <sup>5</sup>-X,1-Y,1-Z; <sup>6</sup>-1+X,-1+Y,+Z

**Table S3** Bond Angles for Zn-MOF

| Atom             | Atom | Atom              | Angle/°    | Atom | Atom | Atom | Angle/°    |
|------------------|------|-------------------|------------|------|------|------|------------|
| O2               | Zn01 | Zn04 <sup>1</sup> | 80.36(11)  | O3   | P007 | P005 | 127.55(16) |
| O2               | Zn01 | O4 <sup>2</sup>   | 93.74(15)  | O3   | P007 | P006 | 126.50(17) |
| O2               | Zn01 | O7                | 91.36(16)  | O3   | P007 | O6   | 94.6(2)    |
| O2               | Zn01 | O11 <sup>2</sup>  | 173.87(15) | O3   | P007 | N00S | 110.7(2)   |
| O24 <sup>1</sup> | Zn01 | Zn04 <sup>1</sup> | 32.03(10)  | O3   | P007 | N00Y | 112.0(3)   |
| O24 <sup>1</sup> | Zn01 | O2                | 86.98(17)  | N00S | P007 | P005 | 88.90(19)  |
| O24 <sup>1</sup> | Zn01 | O4 <sup>2</sup>   | 88.57(14)  | N00S | P007 | P006 | 29.26(18)  |
| O24 <sup>1</sup> | Zn01 | O7                | 91.00(15)  | N00Y | P007 | P005 | 27.9(2)    |
| O24 <sup>1</sup> | Zn01 | O11 <sup>2</sup>  | 86.91(16)  | N00Y | P007 | P006 | 87.5(2)    |
| O4 <sup>2</sup>  | Zn01 | Zn04 <sup>1</sup> | 58.16(10)  | N00Y | P007 | O6   | 110.8(2)   |
| O7               | Zn01 | Zn04 <sup>1</sup> | 122.23(11) | N00Y | P007 | N00S | 116.7(3)   |
| O7               | Zn01 | O4 <sup>2</sup>   | 174.85(15) | C19  | O9   | P005 | 124.3(3)   |
| O7               | Zn01 | O11 <sup>2</sup>  | 88.17(14)  | C26  | O12  | P005 | 130.3(3)   |
| O19              | Zn01 | Zn04 <sup>1</sup> | 138.43(11) | C1   | O1   | Zn02 | 123.8(3)   |

| Atom             | Atom | Atom              | Angle/°    | Atom              | Atom | Atom              | Angle/°    |
|------------------|------|-------------------|------------|-------------------|------|-------------------|------------|
| O19              | Zn01 | O2                | 97.98(17)  | C12               | O6   | P007              | 118.4(4)   |
| O19              | Zn01 | O24 <sup>1</sup>  | 168.43(14) | C15               | O8   | Zn02 <sup>3</sup> | 129.8(3)   |
| O19              | Zn01 | O4 <sup>2</sup>   | 80.70(14)  | C5                | O3   | P007              | 122.4(4)   |
| O19              | Zn01 | O7                | 99.29(15)  | C1                | O2   | Zn01              | 130.5(4)   |
| O19              | Zn01 | O11 <sup>2</sup>  | 88.13(16)  | C40               | O18  | P006              | 123.5(3)   |
| O11 <sup>2</sup> | Zn01 | Zn04 <sup>1</sup> | 94.73(10)  | Zn01 <sup>1</sup> | O24  | Zn03 <sup>4</sup> | 115.38(18) |
| O11 <sup>2</sup> | Zn01 | O4 <sup>2</sup>   | 86.69(14)  | Zn04              | O24  | Zn01 <sup>1</sup> | 114.32(19) |
| O1               | Zn02 | Zn02 <sup>3</sup> | 97.74(12)  | Zn04              | O24  | Zn03 <sup>4</sup> | 104.10(18) |
| O1               | Zn02 | O8 <sup>3</sup>   | 172.27(16) | C8                | O4   | Zn01 <sup>6</sup> | 142.5(4)   |
| O1               | Zn02 | O19 <sup>3</sup>  | 92.90(15)  | C15               | O7   | Zn01              | 122.3(4)   |
| O1               | Zn02 | O19               | 98.63(16)  | Zn01              | O19  | Zn02              | 117.42(18) |
| O1               | Zn02 | O21               | 88.81(15)  | Zn01              | O19  | Zn02 <sup>3</sup> | 119.42(18) |
| O1               | Zn02 | O20               | 83.73(16)  | Zn02              | O19  | Zn02 <sup>3</sup> | 96.09(16)  |
| O8 <sup>3</sup>  | Zn02 | Zn02 <sup>3</sup> | 89.95(12)  | C22               | O10  | Zn03              | 114.1(3)   |
| O8 <sup>3</sup>  | Zn02 | O21               | 86.04(15)  | C22               | O11  | Zn01 <sup>6</sup> | 119.6(3)   |
| O8 <sup>3</sup>  | Zn02 | O20               | 90.38(16)  | C8                | O5   | Zn04 <sup>4</sup> | 114.8(3)   |
| O19              | Zn02 | Zn02 <sup>3</sup> | 42.06(10)  | C36               | O17  | Zn04 <sup>5</sup> | 110.1(4)   |
| O19 <sup>3</sup> | Zn02 | Zn02 <sup>3</sup> | 41.85(12)  | C33               | O15  | P006              | 132.8(4)   |
| O19              | Zn02 | O8 <sup>3</sup>   | 87.59(16)  | P006              | N00S | P007              | 121.1(3)   |
| O19 <sup>3</sup> | Zn02 | O8 <sup>3</sup>   | 92.32(15)  | C29               | O14  | Zn03 <sup>4</sup> | 118.1(4)   |
| O19              | Zn02 | O19 <sup>3</sup>  | 83.91(16)  | P006              | N00U | P005              | 122.3(3)   |
| O19              | Zn02 | O21               | 95.22(16)  | C29               | O13  | Zn04              | 121.6(4)   |
| O19 <sup>3</sup> | Zn02 | O21               | 178.18(15) | P005              | N00Y | P007              | 124.2(3)   |
| O19 <sup>3</sup> | Zn02 | O20               | 92.25(16)  | C18               | C19  | O9                | 117.2(5)   |
| O19              | Zn02 | O20               | 175.57(14) | C20               | C19  | O9                | 120.4(5)   |
| O21              | Zn02 | Zn02 <sup>3</sup> | 137.26(13) | C20               | C19  | C18               | 122.3(5)   |
| O21              | Zn02 | O20               | 88.56(16)  | C5                | C4   | C3                | 118.6(5)   |
| O20              | Zn02 | Zn02 <sup>3</sup> | 134.05(11) | O1                | C1   | O2                | 126.1(5)   |
| O24 <sup>4</sup> | Zn03 | Zn04 <sup>4</sup> | 36.24(10)  | O1                | C1   | C2                | 116.8(5)   |
| O24 <sup>4</sup> | Zn03 | C22               | 80.20(16)  | O2                | C1   | C2                | 117.2(5)   |
| O10              | Zn03 | Zn04 <sup>4</sup> | 77.38(13)  | C17               | C16  | C15               | 118.6(5)   |
| O10              | Zn03 | O24 <sup>4</sup>  | 91.11(16)  | C21               | C16  | C15               | 121.7(5)   |
| O10              | Zn03 | O14 <sup>4</sup>  | 127.46(18) | C21               | C16  | C17               | 119.7(5)   |
| O10              | Zn03 | O22               | 93.93(18)  | C26               | C25  | C24               | 118.1(5)   |
| O10              | Zn03 | C22               | 24.39(16)  | C19               | C18  | C17               | 118.7(6)   |
| O23              | Zn03 | Zn04 <sup>4</sup> | 127.48(13) | C25               | C26  | O12               | 113.5(5)   |
| O23              | Zn03 | O24 <sup>4</sup>  | 91.50(16)  | C27               | C26  | O12               | 124.9(5)   |
| O23              | Zn03 | O10               | 119.67(16) | C27               | C26  | C25               | 121.5(5)   |
| O23              | Zn03 | O14 <sup>4</sup>  | 112.82(18) | C7                | C6   | C5                | 118.3(5)   |



| Atom              | Atom | Atom              | Angle/°    | Atom | Atom | Atom              | Angle/°  |
|-------------------|------|-------------------|------------|------|------|-------------------|----------|
| O23               | Zn03 | O22               | 89.23(18)  | C6   | C7   | C2                | 119.6(5) |
| O23               | Zn03 | C22               | 97.94(16)  | C23  | C24  | C25               | 122.0(5) |
| O14 <sup>4</sup>  | Zn03 | Zn04 <sup>4</sup> | 72.97(14)  | C19  | C20  | C21               | 118.5(5) |
| O14 <sup>4</sup>  | Zn03 | O24 <sup>4</sup>  | 89.67(17)  | C26  | C27  | C28               | 119.1(5) |
| O14 <sup>4</sup>  | Zn03 | C22               | 147.88(17) | C40  | C39  | C38               | 117.8(5) |
| O22               | Zn03 | Zn04 <sup>4</sup> | 141.93(13) | O8   | C15  | O7                | 125.6(5) |
| O22               | Zn03 | O24 <sup>4</sup>  | 173.74(16) | O8   | C15  | C16               | 117.0(5) |
| O22               | Zn03 | O14 <sup>4</sup>  | 84.31(19)  | O7   | C15  | C16               | 117.3(5) |
| O22               | Zn03 | C22               | 105.86(18) | C24  | C23  | C22               | 120.8(5) |
| C22               | Zn03 | Zn04 <sup>4</sup> | 81.27(12)  | C24  | C23  | C28               | 118.8(5) |
| Zn03 <sup>4</sup> | Zn04 | Zn01 <sup>1</sup> | 64.58(3)   | C28  | C23  | C22               | 120.4(5) |
| O24               | Zn04 | Zn01 <sup>1</sup> | 33.65(12)  | O10  | C22  | Zn03              | 41.5(2)  |
| O24               | Zn04 | Zn03 <sup>4</sup> | 39.66(13)  | O10  | C22  | O11               | 123.1(5) |
| O24               | Zn04 | O5 <sup>4</sup>   | 116.44(16) | O10  | C22  | C23               | 119.3(5) |
| O24               | Zn04 | C8 <sup>4</sup>   | 96.95(16)  | O11  | C22  | Zn03              | 81.7(3)  |
| O24               | Zn04 | C36 <sup>5</sup>  | 100.23(17) | O11  | C22  | C23               | 117.6(5) |
| O5 <sup>4</sup>   | Zn04 | Zn01 <sup>1</sup> | 90.79(12)  | C23  | C22  | Zn03              | 160.7(4) |
| O5 <sup>4</sup>   | Zn04 | Zn03 <sup>4</sup> | 105.71(13) | C16  | C17  | C18               | 120.3(6) |
| O5 <sup>4</sup>   | Zn04 | C8 <sup>4</sup>   | 24.87(16)  | C32  | C33  | O15               | 115.8(5) |
| O5 <sup>4</sup>   | Zn04 | C36 <sup>5</sup>  | 130.34(19) | C32  | C33  | C34               | 119.2(6) |
| O17 <sup>5</sup>  | Zn04 | Zn01 <sup>1</sup> | 107.82(14) | C34  | C33  | O15               | 125.0(5) |
| O17 <sup>5</sup>  | Zn04 | Zn03 <sup>4</sup> | 150.03(12) | C9   | C10  | C11               | 120.0(5) |
| O17 <sup>5</sup>  | Zn04 | O24               | 118.13(18) | C42  | C41  | C40               | 119.4(6) |
| O17 <sup>5</sup>  | Zn04 | O5 <sup>4</sup>   | 103.27(18) | C4   | C5   | O3                | 116.9(5) |
| O17 <sup>5</sup>  | Zn04 | O13               | 115.8(2)   | C4   | C5   | C6                | 122.4(5) |
| O17 <sup>5</sup>  | Zn04 | C8 <sup>4</sup>   | 101.98(18) | C6   | C5   | O3                | 120.6(5) |
| O17 <sup>5</sup>  | Zn04 | C36 <sup>5</sup>  | 27.12(18)  | C13  | C14  | C9                | 118.6(5) |
| O13               | Zn04 | Zn01 <sup>1</sup> | 130.82(17) | C2   | C3   | C4                | 120.1(5) |
| O13               | Zn04 | Zn03 <sup>4</sup> | 66.31(16)  | C12  | C11  | C10               | 117.9(5) |
| O13               | Zn04 | O24               | 102.2(2)   | C7   | C2   | C1                | 119.0(5) |
| O13               | Zn04 | O5 <sup>4</sup>   | 99.94(19)  | C3   | C2   | C1                | 120.0(5) |
| O13               | Zn04 | C8 <sup>4</sup>   | 121.12(19) | C3   | C2   | C7                | 120.9(5) |
| O13               | Zn04 | C36 <sup>5</sup>  | 103.8(2)   | C12  | C13  | C14               | 118.9(5) |
| C8 <sup>4</sup>   | Zn04 | Zn01 <sup>1</sup> | 67.30(12)  | O4   | C8   | Zn04 <sup>4</sup> | 84.3(3)  |
| C8 <sup>4</sup>   | Zn04 | Zn03 <sup>4</sup> | 101.08(12) | O4   | C8   | O5                | 124.5(5) |
| C36 <sup>5</sup>  | Zn04 | Zn01 <sup>1</sup> | 104.88(13) | O4   | C8   | C9                | 120.4(5) |
| C36 <sup>5</sup>  | Zn04 | Zn03 <sup>4</sup> | 123.69(14) | O5   | C8   | Zn04 <sup>4</sup> | 40.4(2)  |
| C36 <sup>5</sup>  | Zn04 | C8 <sup>4</sup>   | 126.67(19) | O5   | C8   | C9                | 115.1(5) |
| P007              | P006 | P005              | 60.77(6)   | C37  | C36  | Zn04 <sup>5</sup> | 159.0(4) |

$^11-X,1-Y,1-Z$ ;  $^21+X,1+Y, +Z$ ;  $^32-X,2-Y,2-Z$ ;  $^4-X, -Y,1-Z$ ;  $^5-X,1-Y,1-Z$ ;  $^6-1+X, -1+Y, +Z$

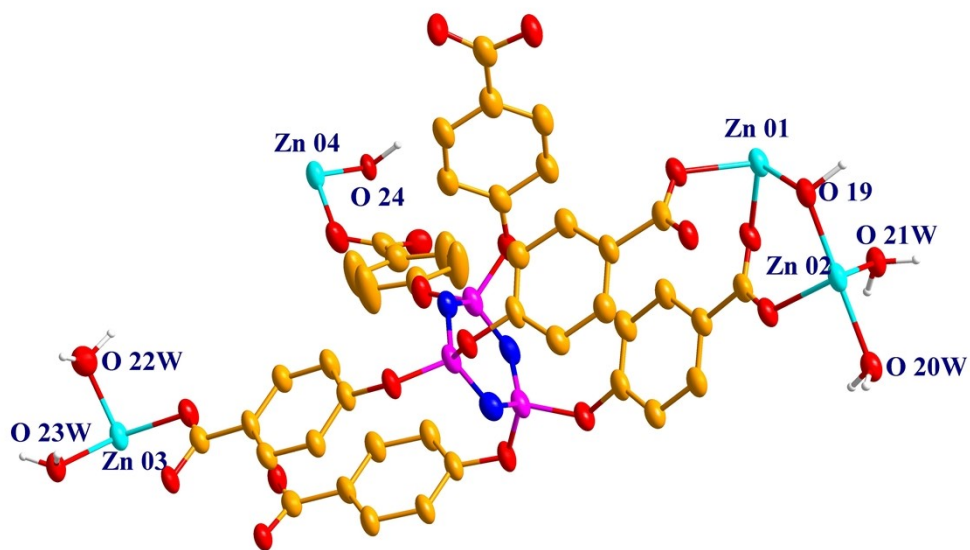

Figure S2 Asymmetric unit of Zn-MOF.

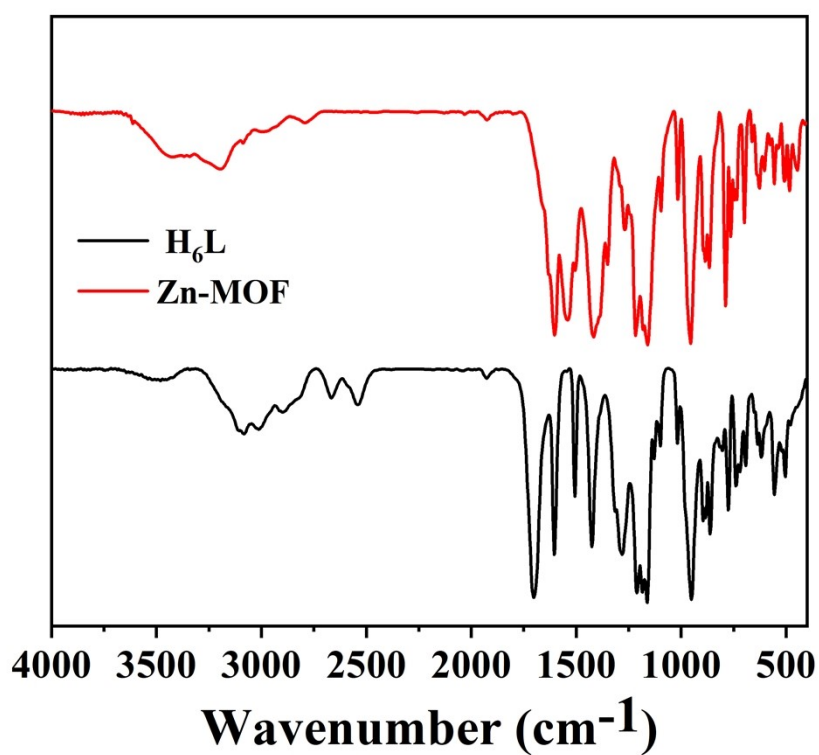

Figure S3 IR spectra of Ligand (black) and Zn-MOF (red)

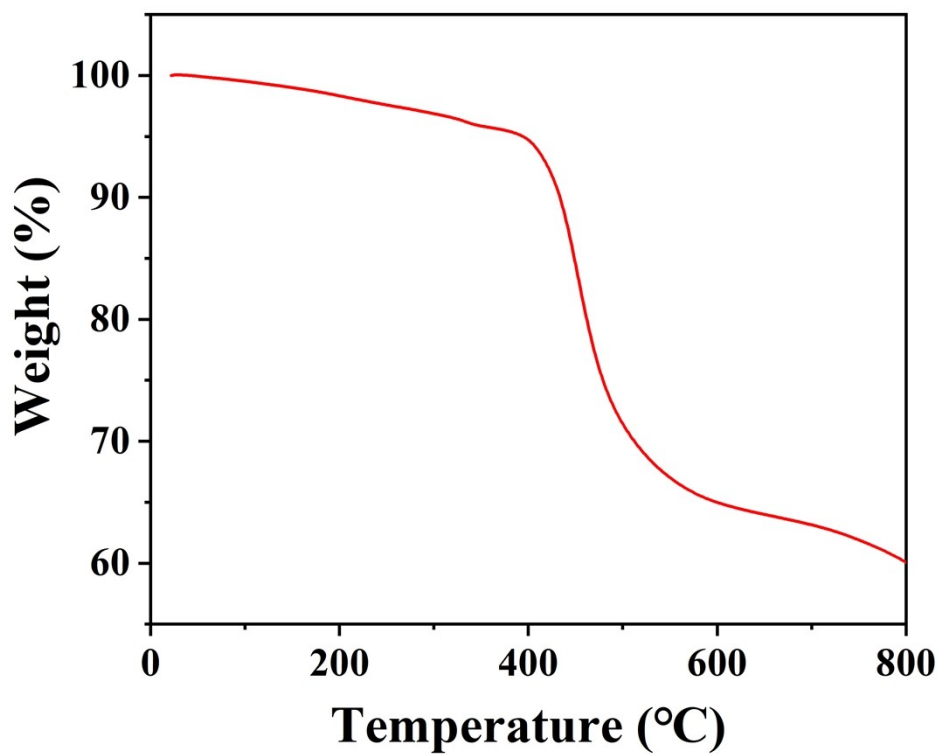

Figure S4 TGA curve of Zn-MOF

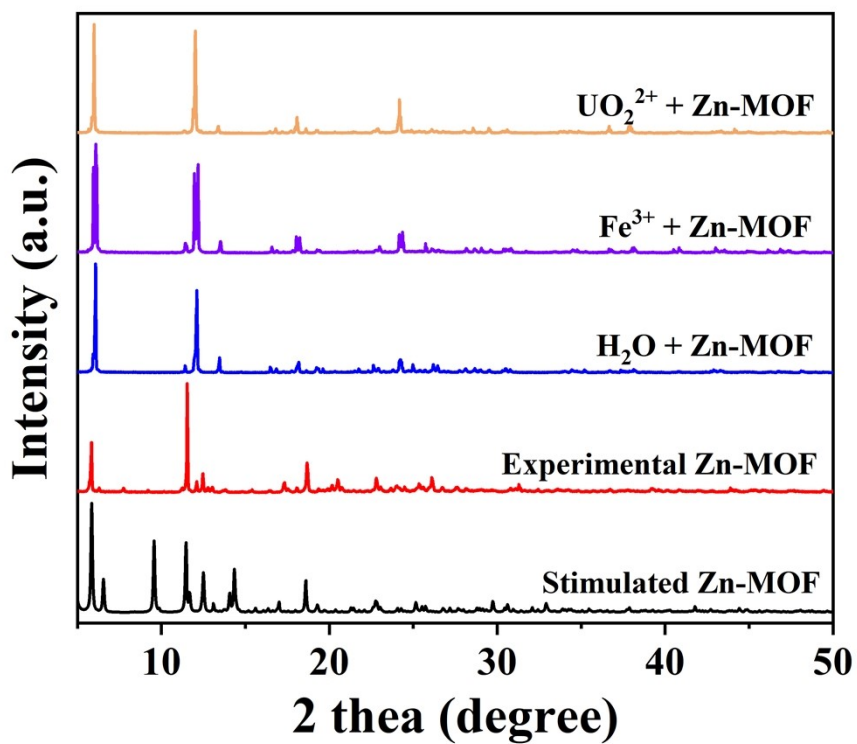

Figure S5 PXRD of Zn-MOF

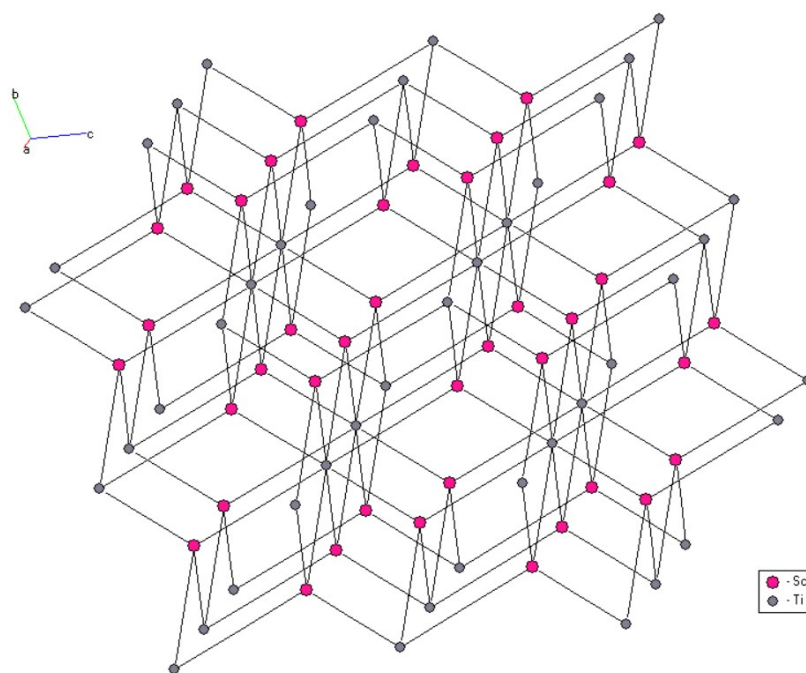

**Figure S6.** Topological structure of Zn-MOF(Si and Ti represent 4-c ligand and 8-c metal nodes)
